# Supplementary material
Source: Springer Nature journal article supplement (https://www.springermedizin.de/resource/supplementary/12967_2012_1207_MOESM1_ESM.pdf/9573250)
Supplement: MOESM1 [file 9573250]

# SCHEMA

Registration

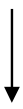

\*Screening blood draw prior to first dose of first-line chemotherapy

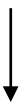

Chemotherapy may be initiated while waiting for CTC result

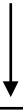

<5 CTC/7.5 mL blood  
Arm A (Low Risk)

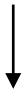

\*\*Follow-up for OS and PFS  
No further blood draws

≥5 CTC/7.5 mL blood

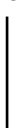

← 2<sup>nd</sup> blood draw  
at Day 22

<5 CTC/7.5 mL

Arm B (Moderate Risk)

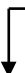

≥5 CTC/7.5 mL

Arm C (High Risk)

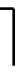

Randomization

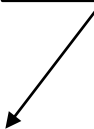

\*\*\*Arm B      \*\*\*Arm C  
Maintain Current Therapy Group

Arm C2  
Switch Therapy Group

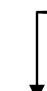

- \* Patients must be registered prior to initiation of testing (no more than one working day prior to initial CTC submission).
- \*\* Patients in the Low Risk Group (Arm A) may enroll in other clinical trials while being followed for OS and PFS on S0500.
- \*\*\* Patients in Arms B and C1 and their physicians will be blinded to which arm they are by study design. Protocol requirements are the same for these two arms.
